# Supplementary material for: Transcriptome sequencing and analysis of the zoonotic parasite Spirometra erinacei spargana (plerocercoids)
Source: PubMed Central journal article supplement (PMC4262225; doi:10.1186/1756-3305-7-368), 2014-08-15

# Top-Hit species distribution

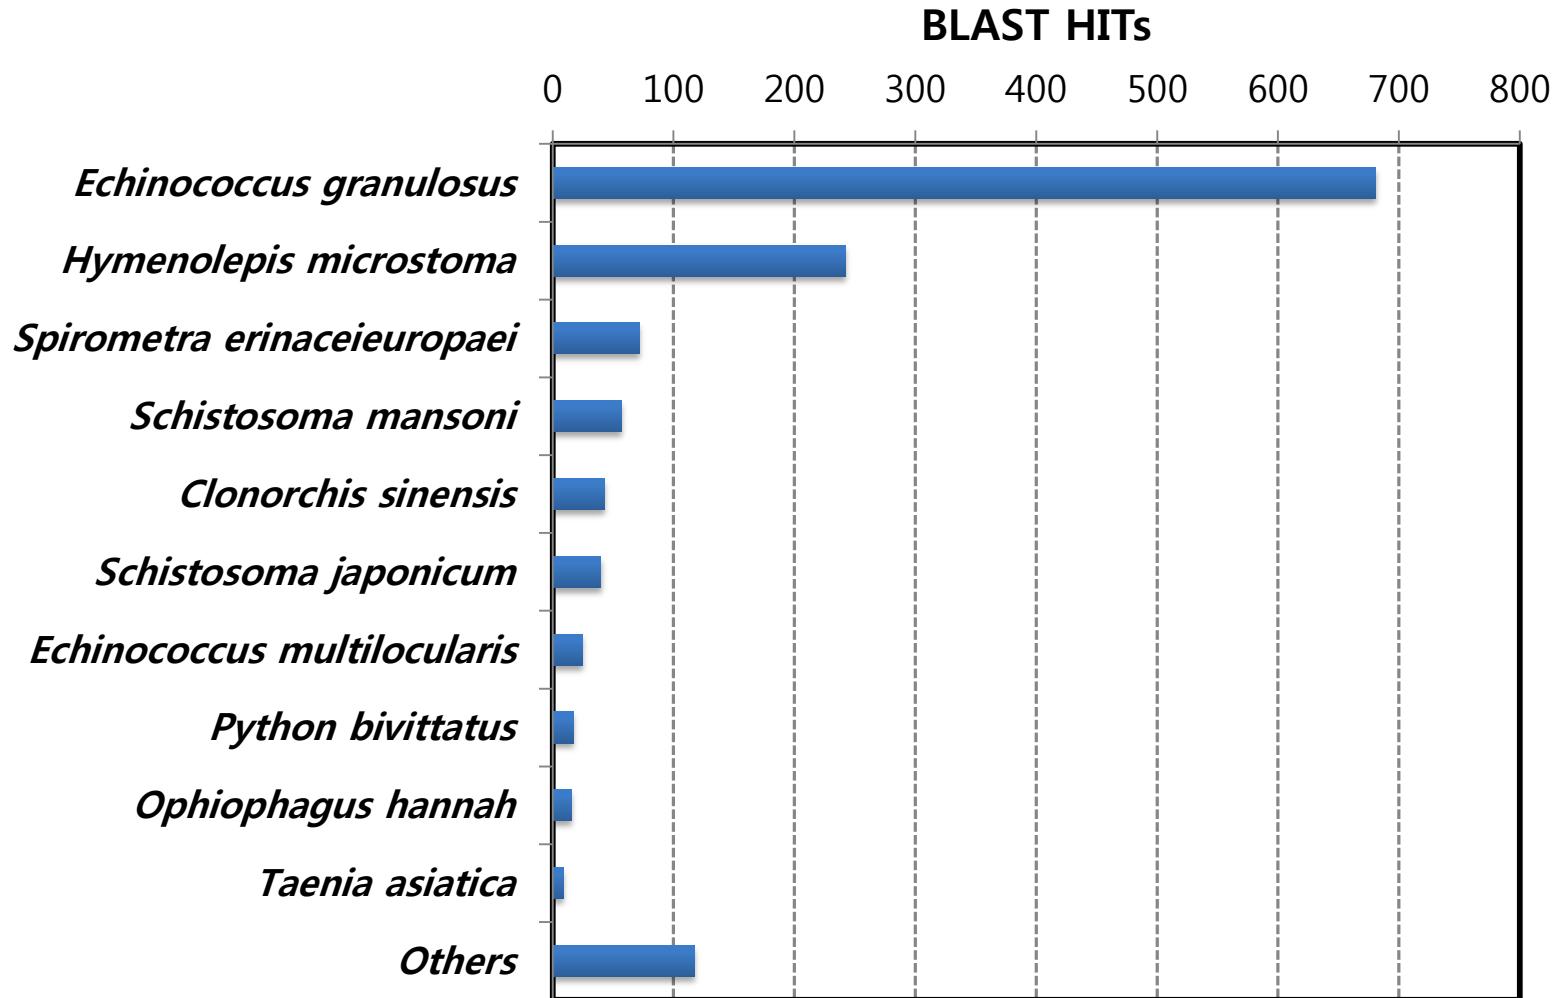

Supplement: 13071_2014_1634_MOESM2_ESM.pdf [file 13071_2014_1634_MOESM2_ESM.pdf]
